# Supplementary material for: Aluminum Nitride Transition Layer for Power Electronics Applications Grown by Plasma-Enhanced Atomic Layer Deposition
Source: MDPI journal article supplement (doi:10.3390/ma12030406), 2019-01-28
Supplement: s1 [file s1]

Article

# Aluminum Nitride Transition Layer for Power Electronics Applications Grown by Plasma-Enhanced Atomic Layer Deposition

Heli Seppänen <sup>1,\*</sup>, Iurii Kim <sup>1,2</sup>, Jarkko Etula <sup>3</sup> and Evgeniy Ubyivovk <sup>4</sup>, Alexei Bouravleuv <sup>1,2</sup> and Harri Lipsanen <sup>1</sup>

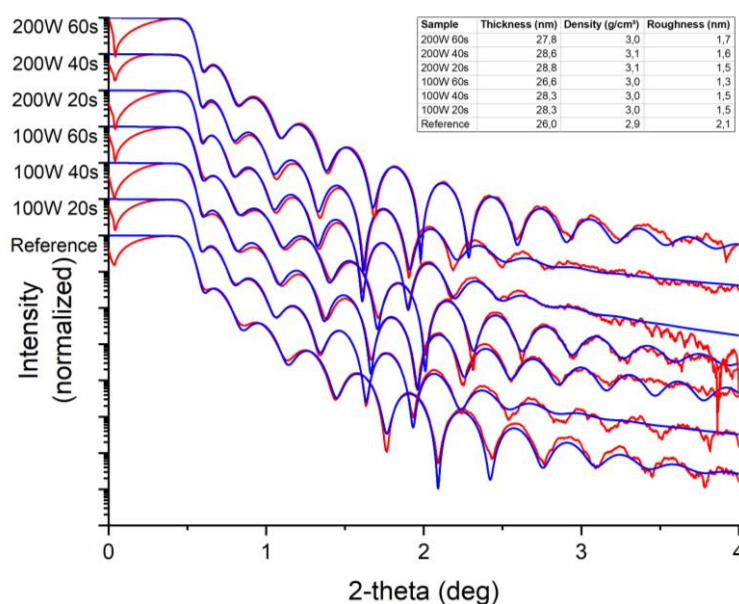

**Figure S1.** The thickness of the film is in accordance with the approximately 28nm thickness obtained from both ellipsometry and X-ray reflectometry.

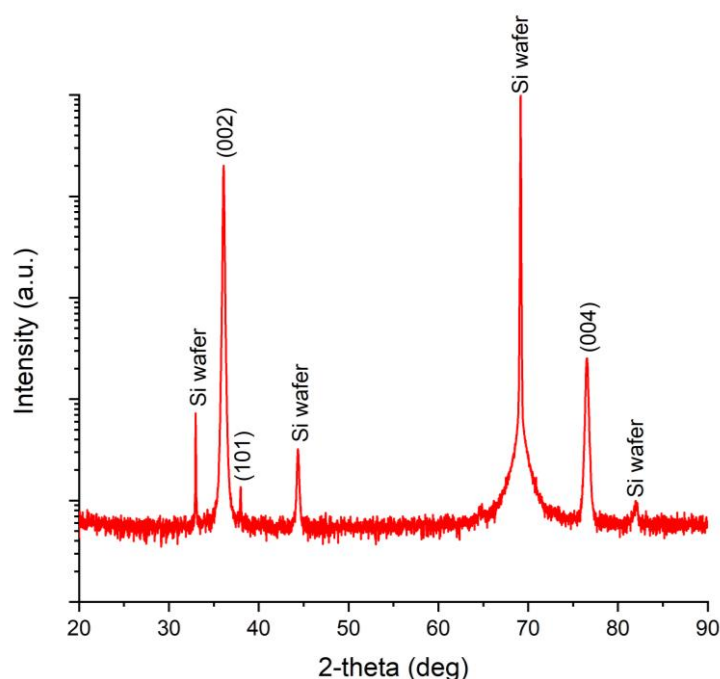

**Figure S2.** The  $\theta$ - $2\theta$  XRD pattern of the regrown AlN by MOCVD on top of PEALD template.
